# Supplementary material for: Perspectives of Public and Private Primary Healthcare Users in Two Regions of Albania on Non-Clinical Quality of Care
Source: PubMed Central journal article supplement — J Prim Care Community Health. 2020 Nov 26;11:2150132720970350. doi: 10.1177/2150132720970350 (PMC7705804; doi:10.1177/2150132720970350), 2020-11-26
Supplement: sj-pdf-1-jpc-10.1177_2150132720970350.pdf [file sj-pdf-1-jpc-10.1177_2150132720970350.pdf]

## Supplement

### Additional analysis using data only from Fier DISTRICT (to be submitted as a supplement)

**Table 2. Supplement.** Comparison of patients' experience on non-clinical quality of care domains by facility type through mean scores † (and 95%-confidence interval) only for Fier district

| Domains/Quality attributes | Mean, [95% Conf. Interval] | Public Urban (2)    | Private Urban (3)    | Public Rural (4)                     | P value |
|----------------------------|----------------------------|---------------------|----------------------|--------------------------------------|---------|
| Dignity                    | 3.72<br>[3.67-3.77]        | 3.82<br>[3.73-3.91] | 3.55<br>[3.45-3.65]  | 2 vs 3; p = 0.07<br>2 vs 4; p < 0.01 |         |
| Communication              | 3.69<br>[3.59-3.79]        | 3.70<br>[3.56-3.85] | 3.82<br>[3.76-3.88]  | 2 vs 3; p = 0.95<br>2 vs 4; p = 0.03 |         |
| Coordination of care       | 2.76<br>[2.57-2.96]        | 2.12<br>[1.90-2.34] | 3.33<br>[3.17-3.50]  | 2 vs 3; p < 0.01<br>2 vs 4; p < 0.01 |         |
| Confidentiality            | 3.54<br>[3.34-3.75]        | 3.79<br>[3.68 3.90] | 3.54<br>[3.30-3.77]  | 2 vs 3; p = 0.04<br>2 vs 4; p = 0.96 |         |
| Choice                     | 2.26<br>[2.09-2.43]        | 2.34<br>[2.05-2.63] | 2.89<br>[2.42-3.35]  | 2 vs 3; p = 0.64<br>2 vs 4; p = 0.02 |         |
| Autonomy                   | 3.22<br>[2.94-3.50]        | 3.42<br>[3.22-3.62] | 3.24<br>[3.08-3.40]  | 2 vs 3; p = 0.24<br>2 vs 4; p = 0.88 |         |
| Prompt attention           | 3.07<br>[2.91-3.22]        | 2.87<br>[2.70-3.04] | 2.85<br>[2.75- 2.96] | 2 vs 3; p = 0.10<br>2 vs 4; p = 0.03 |         |

---

|                            |                     |                     |                     |                                      |
|----------------------------|---------------------|---------------------|---------------------|--------------------------------------|
| Quality of basic amenities | 2.84<br>[2.36-3.33] | 3.67<br>[3.61-3.74] | 2.96<br>[2.64-3.28] | 2 vs 3; p <0.01<br>2 vs 4; p = 0.70  |
| <b>Total score</b>         | 3.14<br>[3.05-3.23] | 3.25<br>[3.14-3.35] | 3.30<br>[3.20-3.39] | 2 vs 3; p = 0.12<br>2 vs 4; p = 0.02 |

---

† Mean values were obtained from linear mixed models with random intercepts for districts and facilities nested in districts. Statistically significant, p<0.05.
